# Supplementary material for: Changes in norovirus genotype diversity in gastroenteritis outbreaks in Alberta, Canada: 2012–2018
Source: Springer Nature journal article supplement (doi:10.1186/s12879-019-3792-y), 2019-02-19
Supplement: MOESM2 [file 16492620]

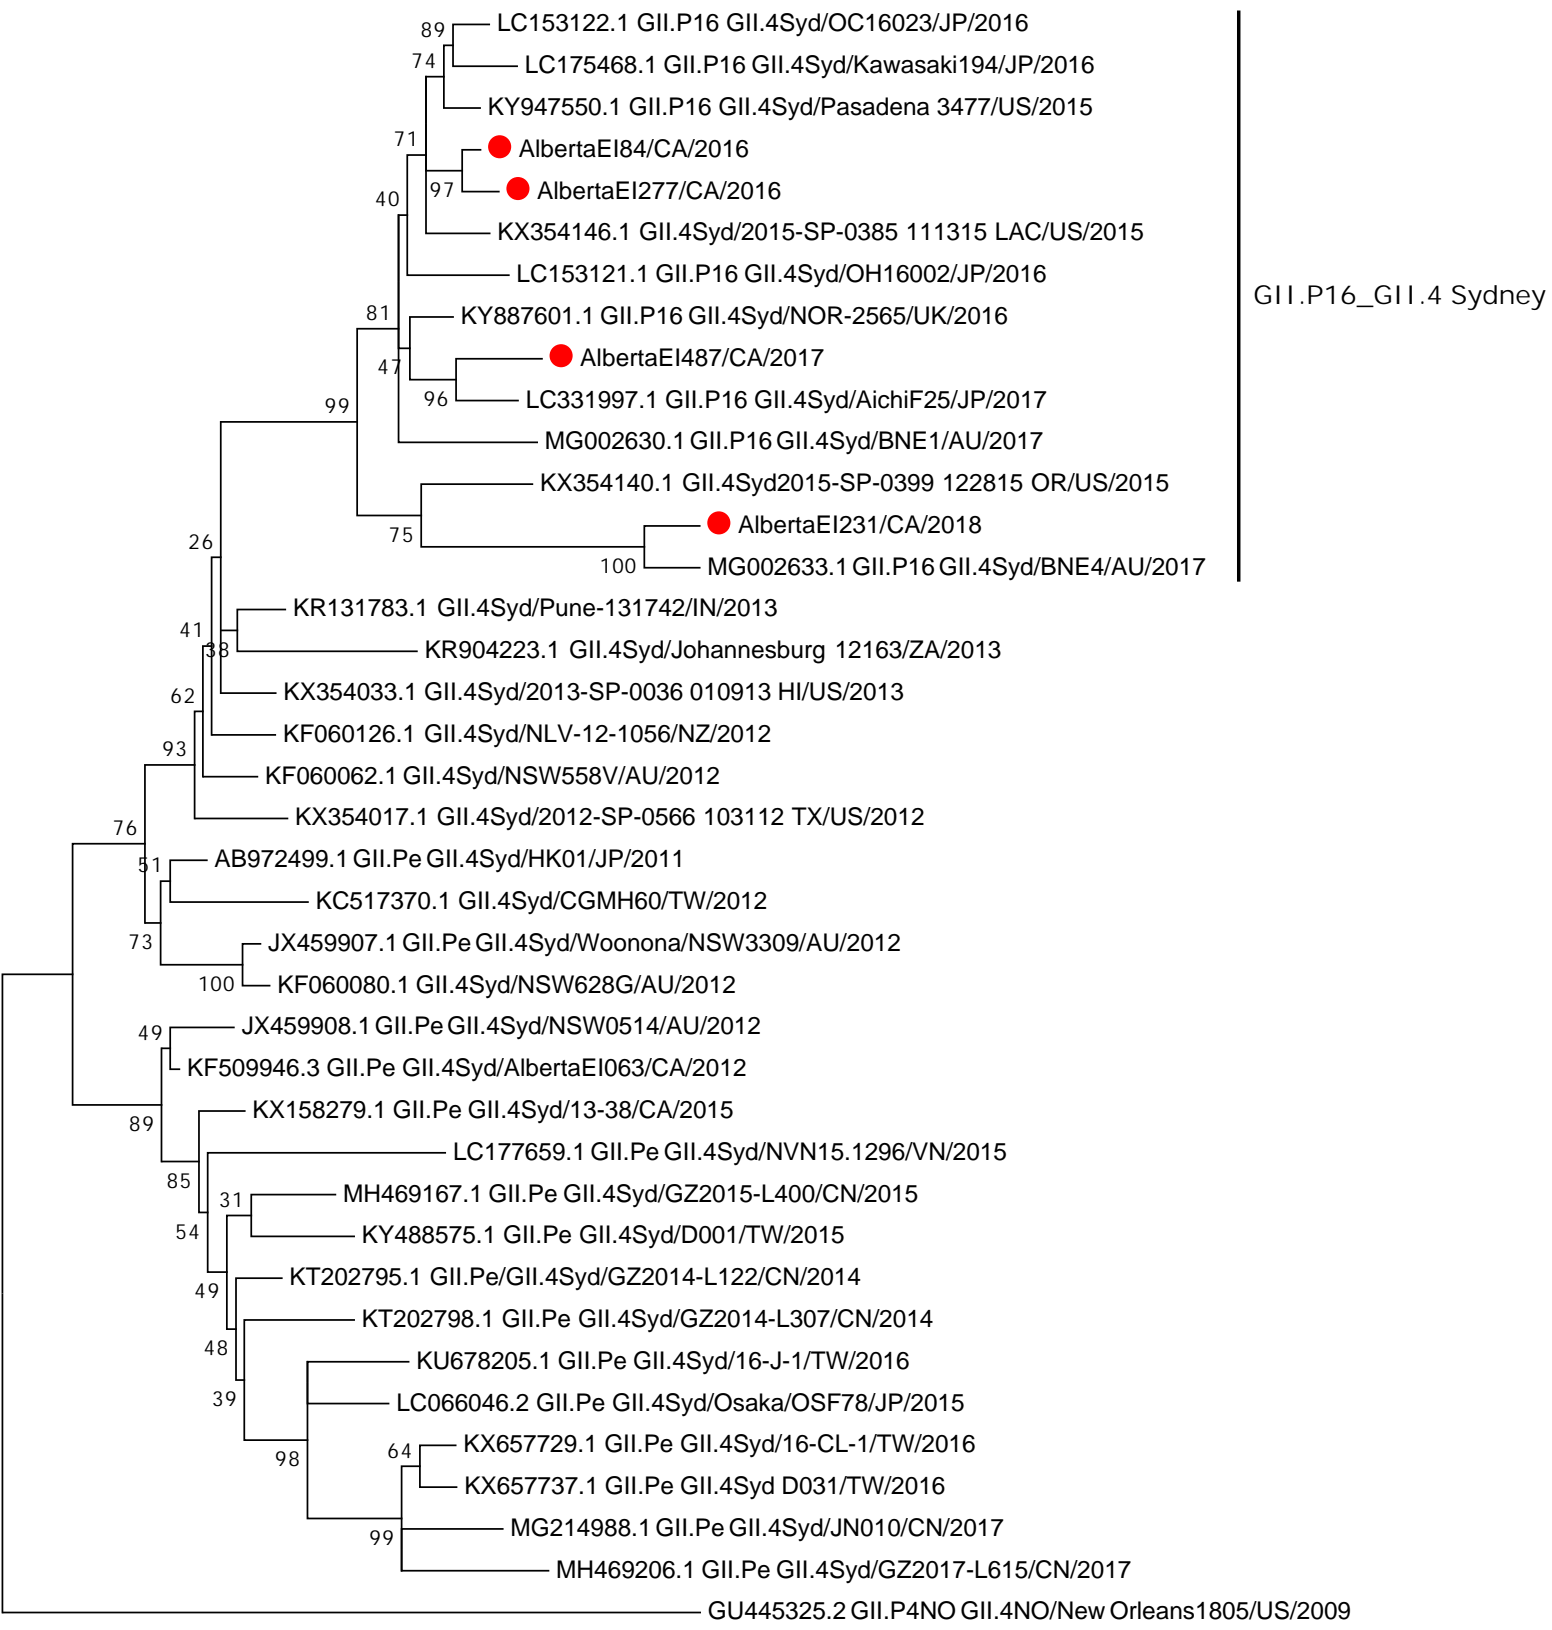

0.01
