# Supplementary material for: Changes in norovirus genotype diversity in gastroenteritis outbreaks in Alberta, Canada: 2012–2018
Source: Springer Nature journal article supplement (doi:10.1186/s12879-019-3792-y), 2019-02-19

A.

AB-2016-26

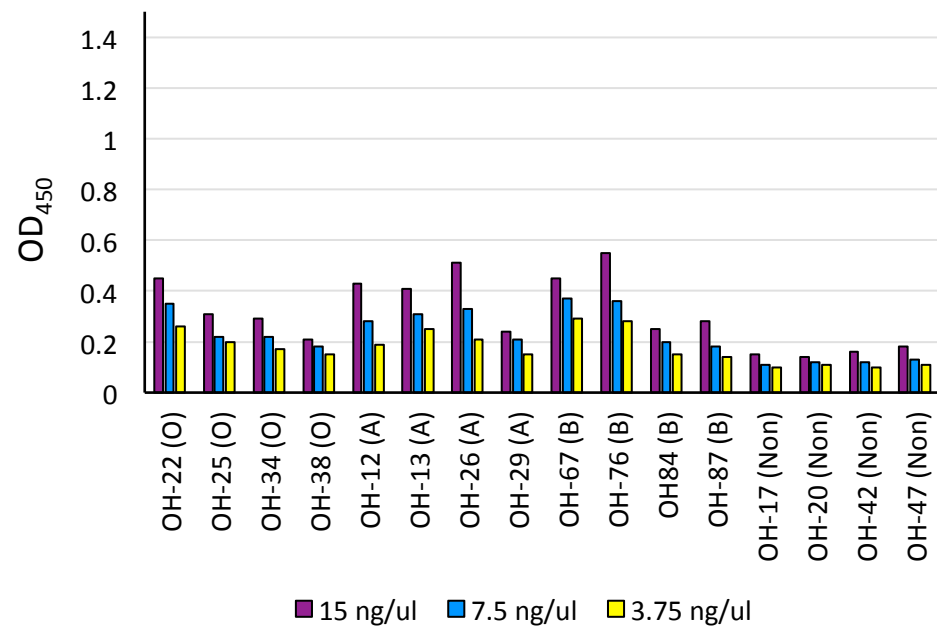

B.

AB-2016-190

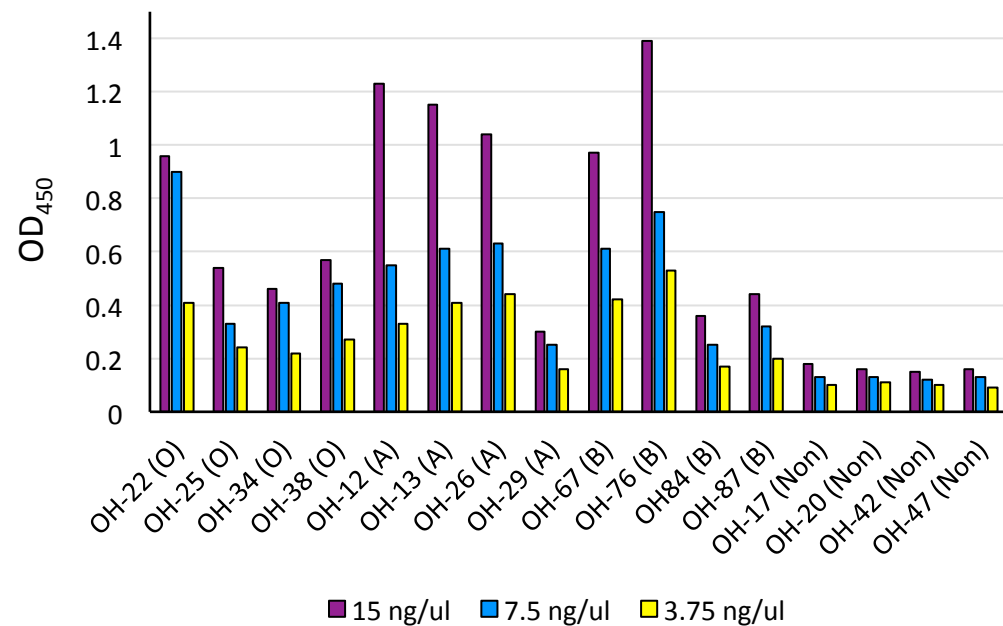

C.

Syd9-2B

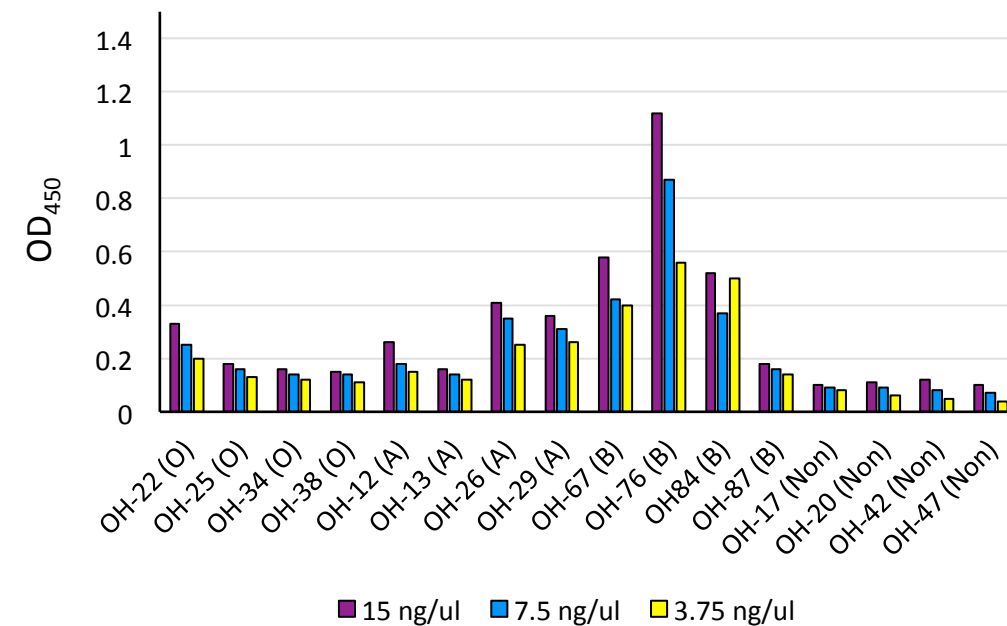

Supplement: MOESM4 [file 16492620]
